# Supplementary material for: Evaluation of a universal coverage bed net distribution campaign in four districts in Sofala Province, Mozambique
Source: PubMed Central journal article supplement (PMC4232630; doi:10.1186/1475-2875-13-427), 2014-11-05
Supplement: 12936_2014_3585_MOESM1_ESM.pdf [file 12936_2014_3585_MOESM1_ESM.pdf]

**Table S1.** Cross-tabulation of number of beds in household versus the total number of household members, from 2010 and 2011 evaluation of universal coverage distribution campaign in Sofala Province, Mozambique

|                             |    | Number of Beds in Household |          |          |          |          |         |         |         |   |
|-----------------------------|----|-----------------------------|----------|----------|----------|----------|---------|---------|---------|---|
|                             |    | 1                           | 2        | 3        | 4        | 5        | 6       | 7       | 8       |   |
| Number of Household Members | 1  | 180 (99)                    | 2 (1.1)  | 0        | 0        | 0        | 0       | 0       | 0       | 0 |
|                             | 2  | 217 (72)                    | 81 (27)  | 0        | 2 (<1)   | 0        | 0       | 0       | 0       | 0 |
|                             | 3  | 179 (46)                    | 171 (44) | 35 (9.1) | 1 (<1)   | 0        | 0       | 0       | 0       | 0 |
|                             | 4  | 88 (20)                     | 250 (56) | 96 (21)  | 16 (3.6) | 0        | 0       | 0       | 0       | 0 |
|                             | 5  | 19 (4.8)                    | 211 (53) | 136 (34) | 29 (7.3) | 0        | 0       | 0       | 0       | 0 |
|                             | 6  | 10 (3)                      | 115 (35) | 157 (48) | 34 (10)  | 12 (3.7) | 0       | 0       | 0       | 0 |
|                             | 7  | 5 (1.9)                     | 66 (25)  | 133 (51) | 45 (17)  | 13 (5)   | 0       | 0       | 0       | 0 |
|                             | 8  | 4 (2)                       | 15 (7.4) | 94 (46)  | 61 (30)  | 24 (12)  | 4 (2)   | 0       | 1 (<1)  | 0 |
|                             | 9  | 0                           | 4 (4.8)  | 36 (43)  | 27 (32)  | 13 (15)  | 4 (4.8) | 0       | 0       | 0 |
|                             | 10 | 0                           | 3 (5.8)  | 11 (21)  | 16 (31)  | 16 (31)  | 2 (3.8) | 1 (1.9) | 3 (5.8) | 0 |
|                             | 11 | 0                           | 1 (6.7)  | 1 (6.7)  | 4 (27)   | 3 (20)   | 3 (20)  | 2 (13)  | 1 (6.7) | 0 |
|                             | 12 | 0                           | 0        | 1 (9.1)  | 0        | 6 (55)   | 0       | 2 (18)  | 2 (18)  | 0 |
|                             | 13 | 0                           | 0        | 0        | 0        | 2 (40)   | 3 (60)  | 0       | 0       | 0 |
|                             | 14 | 0                           | 0        | 0        | 2 (100)  | 0        | 0       | 0       | 0       | 0 |
|                             | 15 | 0                           | 0        | 1 (100)  | 0        | 0        | 0       | 0       | 0       | 0 |
|                             | 16 | 0                           | 0        | 0        | 0        | 0        | 2 (100) | 0       | 0       | 0 |
|                             | 17 | 0                           | 0        | 0        | 0        | 0        | 1 (50)  | 0       | 1 (50)  | 0 |

The number in each cell indicates count of households. The numbers in parentheses indicate row percentages. Gray shading indicates the 2 people per sleeping space assumption underlying the Roll Back Malaria Monitoring and Evaluation Reference Group (MERG) access indicators. Overall, the 2 people per sleeping space assumption was met in 47.7% of households, with 39.6% of households having fewer sleeping spaces than expected, and 13.7% of households have more sleeping spaces than expected.
